# **Twelve-month specific IgG response to SARS-CoV-2 receptor-binding domain among COVID-19 convalescent plasma donors in Wuhan**

Cesheng Li<sup>1</sup>, Ding Yu<sup>2,3</sup>, Xiao Wu<sup>1</sup>, Hong Liang<sup>2,3</sup>, Zhijun Zhou<sup>1</sup>, Yong Xie<sup>1,3</sup>, Taojing Li<sup>3</sup>,  
Junzheng Wu<sup>2</sup>, Fengping Lu<sup>1</sup>, Lu Feng<sup>1</sup>, Min Mao<sup>1</sup>, Lianzhen Lin<sup>1</sup>, Huanhuan Guo<sup>1</sup>, Shenglan  
Yue<sup>1</sup>, Feifei Wang<sup>1</sup>, Yan Peng<sup>1</sup>, Yong Hu<sup>1</sup>, Zejun Wang<sup>4</sup>, Jianhong Yu<sup>1</sup>, Yong Zhang<sup>3</sup>, Jia Lu<sup>4</sup>,  
Haoran Ning<sup>1</sup>, Huichuan Yang<sup>5</sup>, Daoxing Fu<sup>3</sup>, Yanlin He<sup>1,3</sup>, Dongbo Zhou<sup>3,4</sup>, Tao Du<sup>3</sup>, Kai Duan<sup>4</sup>,  
Demei Dong<sup>3</sup>, Kun Deng<sup>1</sup>, Xia Zou<sup>1</sup>, Ya Zhang<sup>1</sup>, Rong Zhou<sup>3</sup>, Yang Gao<sup>3</sup>, Xinxin Zhang<sup>6</sup> &  
Xiaoming Yang<sup>5</sup>

<sup>1</sup>Sinopharm Wuhan Plasma-derived Biotherapies Co., Ltd, 430207 Wuhan, China.

<sup>2</sup>Chengdu Rongsheng Pharmaceuticals Co., Ltd, 610041 Chengdu, China.

<sup>3</sup>Beijing Tiantan Biological Products Co., Ltd, 100024 Beijing, China.

<sup>4</sup>China National Biotech Group Company Limited, 100029 Beijing, China.

<sup>5</sup>Wuhan Institute of Biological Products Co. Ltd., 430207 Wuhan, China.

<sup>6</sup>Research Laboratory of Clinical Virology, Ruijin Hospital and Ruijin Hospital North, National  
Research Center for Translational Medicine, Shanghai Jiao Tong University of Medicine, 200025  
Shanghai, China.

- 21    **Authorship note:** Cesheng Li and Ding Yu are co-first authors. Xinxin Zhang and Xiaoming
- 22    Yang are co-senior authors.

## 23    **Abstract**

24    To investigate the duration of humoral immune response in convalescent coronavirus  
 25    disease 2019 (COVID-19) patients, we conducted a 12-month longitudinal study  
 26    through collecting a total of 1,782 plasma samples from 869 convalescent plasma  
 27    donors in Wuhan, China and tested specific antibody response. The results show that  
 28    positive rate of IgG antibody against receptor-binding domain of spike protein  
 29    (RBD-IgG) to severe acute respiratory syndrome coronavirus 2 (SARS-CoV-2) in the  
 30    COVID-19 convalescent plasma donors exceeded 70% for 12 months post diagnosis.  
 31    RBD-IgG kinetics displayed a gradually downward trend, the titer started to stabilize  
 32    after 9 months and decreased by 68.1% compared with the 1st month. Moreover, male  
 33    plasma donors produced more RBD-IgG than female plasma donors and patient age  
 34    positively correlated with the RBD-IgG titer. A strong positive correlation between  
 35    RBD-IgG and neutralizing antibody titers was also identified. This study is essential  
 36    for understanding SARS-CoV-2-induced immune memory to develop vaccine and  
 37    therapeutics.

38

## 39 Introduction

40 Since the emergence of coronavirus disease 2019 (COVID-19), caused by severe  
41 acute respiratory syndrome coronavirus 2 (SARS-CoV-2) in December 2019, the  
42 virus has spread rapidly and globally, leading to a pandemic outbreak. As of February  
43 19, 2021, SARS-CoV-2 has infected more than 109 million people worldwide, with  
44 the death toll exceeding 2.4 million, and approximately 364,000 newly diagnosed  
45 cases are still daily reported (<https://covid19.who.int/>, accessed February 19, 2021).

46 Several SARS-CoV-2 vaccines have been approved worldwide, but their  
47 longevity of immune protection is still uncertain. Evaluating the durability of the  
48 immune response, especially humoral immune response, induced by SARS-CoV-2 is  
49 essential to understand the pathogenesis of SARS-CoV-2 and predict the longevity of  
50 its vaccine protection, which further facilitates the urgent development of vaccine or  
51 therapeutics<sup>1</sup>. In the patients infected with severe acute respiratory syndrome  
52 coronavirus 1 (SARS-CoV-1), the specific antibodies against SARS-CoV-1 can last  
53 for an average of 2 years, with the positive rate and titer of SARS-CoV-1-specific  
54 neutralizing antibodies significantly reduced at the third year. Therefore, SARS  
55 patients may become susceptible to the same virus 3 years after recovered from the  
56 infection<sup>2</sup>, highlighting the importance of evaluating the durability of the humoral  
57 immune response to SARS-CoV-2.

58 The antibody responses against SARS-CoV-2 in humans are induced by some  
59 viral proteins, including spike glycoprotein (S protein) and nucleocapsid protein,

---

among which S protein can induce neutralizing antibodies that are indispensable for viral neutralization and elimination, through blocking viral binding with host cells<sup>1</sup>. Similar as SARS-CoV-1, SARS-CoV-2 enters host cells via the binding with S protein to angiotensin-converting enzyme 2 (ACE2)<sup>3</sup>, which is expressed on the surface of human alveolar epithelial cells, small intestinal epithelial cells, endothelial cells, and arterial smooth muscle cells<sup>4</sup>. SARS-CoV-2 S protein has an approximate size of 180 kDa, consisted of S1 and S2 subunits, the former of which contains ACE2 receptor binding domain (RBD, amino acid residues 331-524)<sup>5</sup>. Anti-RBD IgG (RBD-IgG) titers have been shown to be strongly and positively correlated with virus neutralization<sup>6</sup>. Although highly homologous amino acid sequences are shared between the RBD regions of SARS-CoV-2 and SARS-CoV-1, the plasma of convalescent SARS patients or SARS-CoV-1 RBD monoclonal antibodies could not neutralize SARS-CoV-2, indicating the limited cross-neutralization protection between these two viruses<sup>5,7</sup>. Nevertheless, successful convalescent plasma therapy for COVID-19 patients has been reported: The symptoms of 10 severe COVID-19 patients who received 200 mL of convalescent plasma containing high-titer neutralizing antibody were significantly improved or even completely disappeared within 3-7 days<sup>8</sup>.

Furthermore, it has been reported that most COVID-19 patients could produce virus-specific IgM, IgA, and IgG antibodies within a few days after infection<sup>1</sup>. According to a longitudinal study, though both IgM and IgA antibodies are produced

early within one week after symptom onset, IgM reaches the peak at the 10th-12th days but the level subsequently decreases after 18 days, while IgA response persists at a higher level for a longer time period, reaching the peak at the 20th-22nd days<sup>9</sup>. On the contrary, the level of IgG antibody keeps increasing for 3 weeks after symptom onset, declines after 8 weeks, while remains detectable over 8 months<sup>1, 10, 11</sup>. However, the antibody response and neutralizing activity in COVID-19 convalescent patients up to 12 months are still unclear. For preventing and controlling SARS-CoV-2, as well as the vaccine development, the duration of functional neutralizing antibody response after individual infection with SARS-CoV-2 and the protective immunity for reinfection are necessary to be investigated by a long-term study.

Therefore, we aimed to investigate the RBD-IgG response of convalescent COVID-19 patients for up to 12 months. In this study, a total of 1,782 convalescent plasma samples from 869 COVID-19 convalescent plasma donors were tested for the presence and titers of RBD-IgG, which was proved to be positively associated with neutralizing antibody titers. In addition, influences of other factors (gender, age, and blood type) on the kinetics of RBD-IgG responses were analyzed. Our finding is critical for assessing the durability of the protective immunity induced by COVID-19 vaccines and predicting the future trend of COVID-19 pandemic.

100

## 101     **Results**

102     **Sustained RBD-IgG responses to SARS-CoV-2 RBD.** In order to study the  
103     SARS-CoV-2 RBD-IgG responses in convalescent COVID-19 patients, 1,782 plasma  
104     samples obtained from 869 COVID-19 convalescent plasma donors in Wuhan were  
105     analyzed. All the samples were collected within 12 months after diagnosis. The  
106     presence and titers of RBD-IgG in the plasma samples were tested by using a  
107     CE-marked SARS-CoV-2 IgG enzyme-linked immunosorbent assay (ELISA) kit <sup>12</sup>.  
108     Figure 1A shows the positive rate of RBD-IgG in the convalescent plasma donors at  
109     different time points within 12 months after diagnosis. Specifically, a total of 390  
110     plasma samples from plasma donors at the 1st and 2nd months after diagnosis (defined  
111     as the early stage following diagnosis) were tested, and the positive rate of  
112     SARS-CoV-2 RBD-IgG was 94.6% (the RBD-IgG titer was 1:80 or higher). At the 6th  
113     and 7th months after diagnosis (defined as the middle stage following diagnosis) and  
114     the 11th and 12th months after diagnosis (defined as the late period following  
115     diagnosis), the positive rates of RBD-IgG were 89.4% and 81.4%, respectively. The  
116     titers of RBD-IgG were categorized as <1:80, 1:80 (the actual value range is greater  
117     than or equal to 80 but less than 160), 1:160 (the actual value range is greater than or  
118     equal to 160 but less than 320), 1:320 (the actual value range is greater than or equal to  
119     320 but less than 640), 1:640 (the actual value range is greater than or equal to 640 but  
120     less than 1280), 1:1280 (the actual value range is greater than or equal to 1280 but less  
121     than 2560), and  $\geq 1:2560$ . Titers less than 80 were considered as negative, 1:80-1:160 as

low titers, 1:320-1:640 as moderate titers, and 1:1280 and  $\geq$  1:2560 as high titers<sup>13</sup>. As shown in Figure 1B, the proportion of higher titers displayed a time-dependent downward trend, while the proportion of negative titers showed the opposite. Specifically, the proportions of plasma samples with moderate and high titers of RBD-IgG were 72.6%, 41.3%, and 27.2% at the early, middle, and late stages following diagnosis, respectively (Supplemental Table 1). It should be noted that even at the early stage following diagnosis, the titers of RBD-IgG in 5.4% of the convalescent plasma donors were at an undetectable level (<1:80) (Supplemental Table 1), which might be attributed to the failure of antibody production during infection or the low sensitivity of the method for antibody detection. As expected, at the late stage following diagnosis, the proportion of negative titers increased to 18.6% (Supplemental Table 1).

**Longitudinal analysis of RBD-IgG responses.** We further determined the kinetics of RBD-IgG in COVID-19 plasma donors within 12 months after diagnosis. Monthly RBD-IgG titers were calculated and shown as geometric mean titers (GMT). As displayed in Figure 2A, the RBD-IgG titers in convalescent plasma donors decreased within 12 months. After 9 months, the RBD-IgG titers began to stabilize at a GMT of approximately 200. The RBD-IgG titer at the 12th month following diagnosis was 69.86% lower (a GMT of 189) than that at the 1st month following diagnosis (Figure 2A). As aforementioned, the antibody response dramatically augmented at the initial



stage after SARS-CoV-2 infection, followed by gradual declining<sup>1, 10, 11</sup>. Since the plasma samples were collected after the discharge of the plasma donors from hospital (no less than 3 weeks after symptom onset), the period of antibody generation and expansion during the initial stage of onset might not be included.

In addition, we further analyzed the kinetics of RBD-IgG in 14 COVID-19 convalescent plasma donors who repeatedly donated plasma for 3 or more than 3 times. Consistent with the general kinetics of RBD-IgG for COVID-19 convalescent plasma donors, the titers of individual plasma clearly displayed a downward trend within approximately 300 days (Figure 2B).

In order to evaluate the stability of RBD-IgG titers in COVID-19 convalescent plasma donors after a long period of time, we re-collected the plasma from 237 donors, who presented different titer levels of RBD-IgG at the early stage following diagnosis, during the 10th and 11th months after diagnosis. It shows that the plasma donors with higher initial titers remained faster RBD-IgG attenuation (Figure 3A). Interestingly, after a long period of time, the RBD-IgG titers of the plasma donors with higher initial titers were still higher than those with lower initial titers. From the 1st-2nd month to the 10th-11th months, the RBD-IgG titer decreased by 70.0% to an average GMT of 183 in the 237 plasma donors (Figure 3A). Additionally, we analyzed the changes of RBD-IgG titers in plasma donors stratified by the initial titers from the early stage to the 10th and 11th months. As shown in Figure 3B and Supplemental Table 2, 51.67% of the low titer population turned into negative after a

164 long period of time, while 60.75% of the moderate titer population and 54.29% of the  
165 high titer population decreased by one titer grade. Nevertheless, 11.67% of the low  
166 titer population and 1.87% of the moderate titer population increased by one titer level  
167 after a long period of time (Figure 3B; Supplemental Table 2).

168

169 **Influences of other factors on RBD-IgG responses.** In addition, we also examined  
170 the influences of gender, age, and blood types of the plasma donors on their RBD-IgG  
171 responses. The early, middle, and late stages following diagnosis were analyzed for  
172 the generation and durability of RBD-IgG (Figure 4). The average titer of RBD-IgG  
173 in the plasma samples from male plasma donors was significantly higher than that  
174 from females within 12 months, especially at the early stage following diagnosis  
175 ( $p < 0.0001$ ); however, the significant difference of RBD-IgG titers between male and  
176 female plasma donors was compromised at the middle and late stages following  
177 diagnosis. Furthermore, we found that the RBD-IgG titers were consistently and  
178 positively correlated with the age of the plasma donors, displaying an elevated  
179 RBD-IgG titer along with an increased patient age (Figure 4B). The abovementioned  
180 correlations between RBD-IgG titer and patient gender/age were consistent with the  
181 findings from several previous studies<sup>1, 14, 15</sup>.

182 Zhao et al. reported that during the outbreak of the epidemic in Wuhan, 1,775  
183 COVID-19 patients exhibited a distribution of 37.75%, 26.42%, 25.80%, and 10.03%  
184 for A, B, O and AB blood types, respectively; the distribution in 3,694 normal people

185 in Wuhan was 32.16%, 24.90%, 33.84%, and 9.10% for A, B, O and AB blood types,  
186 respectively <sup>16</sup>. These results indicated that individuals with A-blood type were  
187 associated with a higher risk of infection, while those with O-blood type were  
188 associated with a lower risk of infection and COVID-19 severity <sup>16</sup>. However, in our  
189 study, negligible difference in RBD-IgG titers was found among the COVID-19  
190 plasma donors of different blood types (Figure 4C).

191

192 **Association between neutralizing antibody titers and RBD-IgG titers.** In order to  
193 confirm the correlation between RBD-IgG titers and the neutralizing activity of  
194 convalescent plasma samples, we conducted plaque reduction neutralization test  
195 (PRNT) on Vero cells to define neutralizing antibody titers using an isolated viral  
196 strain <sup>17</sup>. The associations between the titers of PRNT (ID50) and RBD-IgG (dilution  
197 quantitative) based on a total of 150 COVID-19 convalescent plasma samples  
198 collected at the 1st-3rd months after diagnosis were analyzed. As shown in Figure 5, the  
199 PRNT titers were positively correlated with the RBD-IgG titers ( $r=0.703$ ,  $p<0.0001$ ).

200

## 201     **Discussion**

202     The overall immunity to SARS-CoV-2, including the durability of immunity against  
 203     the virus and vaccine-induced protective immunity, has not been fully understood.  
 204     Neutralizing antibody response is crucial for the elimination of cytopathic viruses as  
 205     well as preventing the reinfection of the virus <sup>18</sup>. The eliminating ability of  
 206     neutralizing antibodies against SARS-CoV-2 in humans has been confirmed by  
 207     clinical studies <sup>8</sup>, whereas their protective effectiveness against the viral reinfection  
 208     has only been proved based on animal models <sup>19</sup>.

209     Effective vaccination is well known as the safest path towards herd immunity <sup>1,20</sup>.  
 210     Most COVID-19 vaccine candidates employ same antigen(s) of original  
 211     SARS-CoV-2, implying that the type and kinetics of neutralizing antibody response  
 212     induced by vaccination are similar to those induced by the original live virus <sup>21</sup>. On  
 213     the other hand, it has been reported that IgA and IgM antibodies are produced and  
 214     reduced at the early stage of infection <sup>9</sup>, raising concerns on the sustainable  
 215     neutralizing activity of the patients' plasma. As a consequence, the long-term study of  
 216     neutralizing antibody response in convalescent patients is essential to offer powerful  
 217     support on developing COVID-19 vaccines and therapeutics.

218     At present, the longest observation period for SARS-CoV-2 antibody reaction  
 219     kinetics is only several months <sup>13, 22, 23, 24, 25</sup>, whereas no study has been carried out for  
 220     more than 1 year time period. To investigate the persistence of protective immunity  
 221     against SARS-CoV-2, we completed a year-long kinetic analysis on SARS-CoV-2

RBD-IgG response in 1,782 convalescent plasma samples obtained from 869 COVID-19 plasma donors, and assessed the constant influences of patient gender, age, and blood types on RBD-IgG response kinetics. Based on the fact of no further coronavirus disease outbreaks in Wuhan until the end point of plasma collection in this study, the 12-month immune response against SARS-CoV-2 in the COVID-19 plasma donors included in the present study is considered as primary immune response.

According to our findings, the RBD-IgG response in more than 70% COVID-19 convalescent plasma donors could persist for at least 12 months, indicating that vaccination can effectively restrict the spread of SARS-CoV-2. We will also examine the changes of RBD-IgG titers over a longer period of time. Compared with the titer obtained at the 1st month, the RBD-IgG titer decreased by 69.86% at the 12th month. Moreover, the proportion of the plasma donors whose RBD-IgG titers remained at or above the moderate titer at the late stage following diagnosis was 27.2% (Supplemental Table 1).

Furthermore, we found that although the RBD-IgG titer gradually decreased over time within 12 months, the RBD-IgG titer was stabilized at a GMT of approximately 200 after 9 months following diagnosis. Considering that the half-life of IgG is around 21 days<sup>26</sup>, the sustained persistence of RBD-IgG titer over time is probably produced by long-lived bone marrow plasma cells (BMPCs), which serve as the main source of protective antibodies<sup>27</sup>. In a 7-month study with 73 mild COVID-19 patients

243 participation, S protein-specific long-lived BMPCs were detected in the COVID-19  
244 convalescent patients at the 7th months following diagnosis <sup>27</sup>.

245 We also evaluated the stability of RBD-IgG with different titers (stratification  
246 was based on the titer value at the early stage following diagnosis) after a long time  
247 period (the 10th and 11th months). Although more rapid attenuation of RBD-IgG was  
248 observed in the plasma donors with high titers, after a long time period, the RBD-IgG  
249 in plasma donors with higher initial titers remained to be higher than those with lower  
250 initial titers. Interestingly, we found that the RBD-IgG titers significantly increased in  
251 11.67% of the low-titer population and 1.87% of the moderate-titer population during  
252 the 10th-11th months, which might be attributed to delayed seroconversion in a small  
253 number of plasma donors. Similar phenomena have also been reported by Icahn  
254 School of Medicine at Mount Sinai <sup>13, 28</sup>.

255 Understanding the influences of factors in patient population, including gender,  
256 age, and blood type, on RBD-IgG response is critical to prevent SARS-CoV-2  
257 infection, which can provide potential explanations for clinical symptoms. Therefore,  
258 we further correlated such factors of the COVID-19 plasma donors with their  
259 RBD-IgG titers, and found that the titer of RBD-IgG in male plasma donors was  
260 significantly higher than that in female plasma donors at the early stage following  
261 diagnosis. Consistent with previous reports, the positive correlation between age and  
262 RBD-IgG titer in a population of plasma donors aged 18 to 55 years indicates that  
263 elder plasma donors might develop antibody response against SARS-CoV-2 more

effectively than younger ones<sup>14</sup>. Nevertheless, no significant correlation was identified between the blood type of the patients and their RBD-IgG titers, indicating that although individuals with A blood type are associated with higher risk for SARS-CoV-2 infection, the susceptibility to SARS-CoV-2 is not related to RBD-IgG titers.

Last but not least, we performed PRNT on Vero cells to test the neutralizing antibody titers from 150 COVID-19 convalescent plasma samples, followed by analyzing the correlation between RBD-IgG and neutralizing antibody titers. Consistent with previous report<sup>6</sup>, our data showed a strong positive correlation between these two types of titers (Figure 5).

In conclusion, this 12-month longitudinal study demonstrates that despite of the downward trend of RBD-IgG response kinetics in COVID-19 convalescent plasma donors, over 70% plasma donors persist to produce RBD-IgG at detectable levels for longer than 1 year post diagnosis, which stably remain at a GMT of approximately 200. In addition, the RBD-IgG titers of male plasma donors are higher than those of female plasma donors at the initial stage of infection, meanwhile, age is positively correlated with the RBD-IgG titers. Furthermore, we confirmed the positive association between RBD-IgG and neutralizing antibody titers. Overall, this study provides long-term strong support for the duration of protection by neutralizing antibodies in COVID-19 plasma donors, indicates the potential to prevent

284 SARS-CoV-2 reinfection, and illustrates the role of neutralizing antibodies in clinical  
285 research and development evaluation of vaccines.  
286



## 287 **Methods**

288 **Donors for convalescent plasma transfusion.** From February 1, 2020 to January 10,  
289 2021, 869 COVID-19 convalescent plasma donors in Wuhan, China were recruited,  
290 and 1,782 convalescent plasma samples were collected. Donors all met the criteria for  
291 release of isolation and discharge from hospital according to the “Diagnosis and  
292 Treatment Protocol for Novel Coronavirus Pneumonia (Trial Version 4 and  
293 subsequent versions)”, released by the National Health Commission & State  
294 Administration of Traditional Chinese Medicine. The donors were between 18 and 55  
295 years old, with no history of blood-borne diseases, and screened by clinicians  
296 following blood donation standards. The interval between two plasma collections was  
297 no less than 14 days.

298 As shown in Figure 6A, the average age of the donors was 38.21 years old (95%  
299 CI: 37.67-38.75). The proportion of plasma Rh-positive blood types (a total of 834  
300 donors with blood type recorded) of A, B, O, and AB was 34.89%, 27.46%, 29.38%,  
301 and 8.27%, respectively (Figure 6B).

302  
303 **Plasma preparation and quality control.** Plasma preparation was conducted in  
304 Wuhan according to the “Clinical Treatment Scheme of Plasma in Recovery Period of  
305 Recovered Patients with New Crown Pneumonia (Trial Version 2)”, released by the  
306 National Health Commission & State Administration of Traditional Chinese Medicine.

307 Plasma collection was carried out at least 3 weeks after the first symptom onset of  
308 patients.

309

310 **Detection of SARS-CoV-2 RBD-IgG.** CE-marked coronavirus IgG antibody  
311 detection kit (batch number: NCOG20200808B) from Beijing WanTai Biological  
312 Pharmacy Enterprise Co., Ltd. (Beijing, China) was used to test the titer of RBD-IgG.  
313 COVID-19 convalescent plasma (2020021702) was used as the reference standard  
314 and 2-fold serially diluted with WanTai kit sample dilution buffer at 6 concentrations  
315 (1:10, 1:20, 1:40, 1:80, 1:160, and 1:320). The acceptable criteria for linearity of the  
316 standard curve included: the  $R^2$  value  $> 0.99$ ; the recovery rate of each standard  
317 dilution was within 20% of the target value. The properly diluted samples were added  
318 into RBD antigen-coated plates, and subsequent operations were carried out according  
319 to the instructions of the kit. The absorbance was read at 450 nm using SpectroMAX  
320 plus384 (Molecular Devices, Silicon Valley, CA, United States), with the standard  
321 curve drawn by SoftMax5.2 software.

322

323 **Plaque reduction neutralization test (PRNT).** Neutralizing titers were defined on  
324 Vero cells by PRNT. PRNT was performed in accordance with the method  
325 established previously<sup>17</sup>. Briefly, each individual serum samples were serially diluted  
326 and 1-h incubated with SARS-CoV-2 at 37°C. The serum-virus mixture was added  
327 into pre-cultured Vero E6 cell monolayers for 1-h incubation at 37°C under 5% CO<sub>2</sub>.

---

328 Then, the cell monolayer was incubated for 3 days. Antibody titer was defined as the  
 329 highest serum dilution that induced  $\geq 50\%$  (PRNT50) reduction in viral plaque  
 330 numbers.

331

332 **Statistical analyses.** GraphPad Prism 9.0 was used for statistical analysis. As for  
 333 GMT calculation, the value of RBD-IgG titer in negative reaction ( $<1:80$ ) was set to 1.  
 334 The influences of gender and blood type on RBD-IgG titer were analyzed by  
 335 nonparametric t-test for inter-group difference and by Mann-Whitney test for  
 336 difference between groups. Unpaired t-test with Welch's correction was adopted for  
 337 further analysis when significant difference was found between groups. Neutralizing  
 338 antibody titers were  $\text{Log}_4$ -transformed by and RBD-IgG titers were  $\text{Log}_2$ -transformed.  
 339 Linear regression analysis and Spearman's correlation were used to examine the  
 340 association between neutralizing antibody titers and RBD-IgG titers. A P-value less  
 341 than 0.05 was considered significant.

342

---

343 **Acknowledgments:** We thank all the plasma donors for participating in this study.  
344 This study was funded by the key project of "Preparation of Specific Plasma and  
345 Specific Immunoglobulin form Recovered Patients with 2019-nCoV Infection" (No.  
346 2020YFC0841800) in the special project of "Public Safety, Risk Prevention and  
347 Emergency Technical Equipment" by the Ministry of Science and Technology China.

348  
349 **Author contributions:** XMY, HCY, DXF, YLH and DBZ conceived and designed the  
350 study. CSL, DY and HL contributed to implementation and management of the study.  
351 XXZ revised the study design and critically reviewed the manuscript. FPL, HHG, MM,  
352 YG, RZ and HRN collected the donor samples under the supervision of XW, DMD, YX  
353 and TD. ZJZ and LZL performed ELISA experiments under the supervision of YH. XZ,  
354 YZ and KD performed ABO Blood group tests under the supervision of JHY. JL  
355 performed PRNT experiments under the supervision of ZJW and KD. LF, FFW, SLY  
356 and YP analyzed and interpreted the data. JZW and YZ drafted the manuscript. TJL  
357 generated and finalized the figures under the supervision of HL. All authors reviewed  
358 the manuscript and provided critical feedback on the manuscript.

359  
360 **Competing interests:** The authors have declared that no conflict of interest exists.

361  
362 **Materials & Correspondence:** Xinxin Zhang, Email: [zhangx@shsmu.edu.cn](mailto:zhangx@shsmu.edu.cn).  
363 Xiaoming Yang, Email: [yangxiaoming@sinopharm.com](mailto:yangxiaoming@sinopharm.com).

## References

1. Poland GA, Ovsyannikova IG, Kennedy RB. SARS-CoV-2 immunity: review and applications to phase 3 vaccine candidates. *Lancet* **396**, 1595-1606 (2020).
2. Wu LP, *et al.* Duration of antibody responses after severe acute respiratory syndrome. *Emerg Infect Dis* **13**, 1562-1564 (2007).
3. Sia SF, *et al.* Pathogenesis and transmission of SARS-CoV-2 in golden hamsters. *Nature* **583**, 834-838 (2020).
4. Hamming I, Timens W, Bulthuis ML, Lely AT, Navis G, van Goor H. Tissue distribution of ACE2 protein, the functional receptor for SARS coronavirus. A first step in understanding SARS pathogenesis. *J Pathol* **203**, 631-637 (2004).
5. Ou X, *et al.* Characterization of spike glycoprotein of SARS-CoV-2 on virus entry and its immune cross-reactivity with SARS-CoV. *Nat Commun* **11**, 1620 (2020).
6. Salazar E, *et al.* Relationship between anti-spike protein antibody titers and SARS-CoV-2 *in vitro* virus neutralization in convalescent plasma. *bioRxiv*, 2020.2006.2008.138990 (2020).
7. Jiang RD, *et al.* Pathogenesis of SARS-CoV-2 in Transgenic Mice Expressing Human Angiotensin-Converting Enzyme 2. *Cell* **182**, 50-58 e58 (2020).
8. Duan K, *et al.* Effectiveness of convalescent plasma therapy in severe COVID-19 patients. *Proc Natl Acad Sci U S A* **117**, 9490-9496 (2020).

- 
- 384 9. Padoan A, *et al.* IgA-Ab response to spike glycoprotein of SARS-CoV-2 in  
385 patients with COVID-19: A longitudinal study. *Clin Chim Acta* **507**, 164-166  
386 (2020).
  - 387 10. Dan JM, *et al.* Immunological memory to SARS-CoV-2 assessed for up to 8  
388 months after infection. *Science*, (2021).
  - 389 11. Adams ER, *et al.* Antibody testing for COVID-19: A report from the National  
390 COVID Scientific Advisory Panel. *medRxiv*, 2020.2004.2015.20066407 (2020).
  - 391 12. Chang L, *et al.* The prevalence of antibodies to SARS-CoV-2 among blood  
392 donors in China. *medRxiv*, 2020.2007.2013.20153106 (2020).
  - 393 13. Wajnberg A, *et al.* Robust neutralizing antibodies to SARS-CoV-2 infection  
394 persist for months. *Science* **370**, 1227-1230 (2020).
  - 395 14. Jiang HW, *et al.* SARS-CoV-2 proteome microarray for global profiling of  
396 COVID-19 specific IgG and IgM responses. *Nat Commun* **11**, 3581 (2020).
  - 397 15. Robbiani DF, *et al.* Convergent antibody responses to SARS-CoV-2 in  
398 convalescent individuals. *Nature* **584**, 437-442 (2020).
  - 399 16. Zhao J, *et al.* Relationship between the ABO Blood Group and the COVID-19  
400 Susceptibility. *medRxiv*, 2020.2003.2011.20031096 (2020).
  - 401 17. Xia S, *et al.* Effect of an inactivated vaccine against SARS-CoV-2 on safety and  
402 immunogenicity outcomes: Interim analysis of 2 randomized clinical trials.  
403 *JAMA* **324**, 951-960 (2020).

- 
- 404 18. Dorner T, Radbruch A. Antibodies and B cell memory in viral immunity.  
405 *Immunity* **27**, 384-392 (2007).
- 406 19. Deng W, *et al.* Primary exposure to SARS-CoV-2 protects against reinfection in  
407 rhesus macaques. *Science* **369**, 818-823 (2020).
- 408 20. Fontanet A, Cauchemez S. COVID-19 herd immunity: where are we? *Nat Rev*  
409 *Immunol* **20**, 583-584 (2020).
- 410 21. Jeyanathan M, Afkhami S, Smaill F, Miller MS, Lichty BD, Xing Z.  
411 Immunological considerations for COVID-19 vaccine strategies. *Nat Rev*  
412 *Immunol* **20**, 615-632 (2020).
- 413 22. Crawford KHD, *et al.* Dynamics of neutralizing antibody titers in the months  
414 after SARS-CoV-2 infection. *J Infect Dis*, (2020).
- 415 23. Figueiredo-Campos P, *et al.* Seroprevalence of anti-SARS-CoV-2 antibodies in  
416 COVID-19 patients and healthy volunteers up to 6 months post disease onset.  
417 *Eur J Immunol* **50**, 2025-2040 (2020).
- 418 24. Huang C, *et al.* 6-month consequences of COVID-19 in patients discharged  
419 from hospital: a cohort study. *Lancet* **397**, 220-232 (2021).
- 420 25. Wu J, *et al.* SARS-CoV-2 infection induces sustained humoral immune  
421 responses in convalescent patients following symptomatic COVID-19. *medRxiv*,  
422 2020.2007.2021.20159178 (2020).
- 423 26. Booth BJ, *et al.* Extending human IgG half-life using structure-guided design.  
424 *MAbs* **10**, 1098-1110 (2018).

- 425 27. Ellebedy A, *et al.* SARS-CoV-2 infection induces long-lived bone marrow  
426 plasma cells in humans. *Res Sq*, (2020).
- 427 28. Wajnberg A, *et al.* Humoral response and PCR positivity in patients with  
428 COVID-19 in the New York City region, USA: an observational study. *Lancet*  
429 *Microbe* **1**, e283-e289 (2020).  
430



## Figures and figure legends

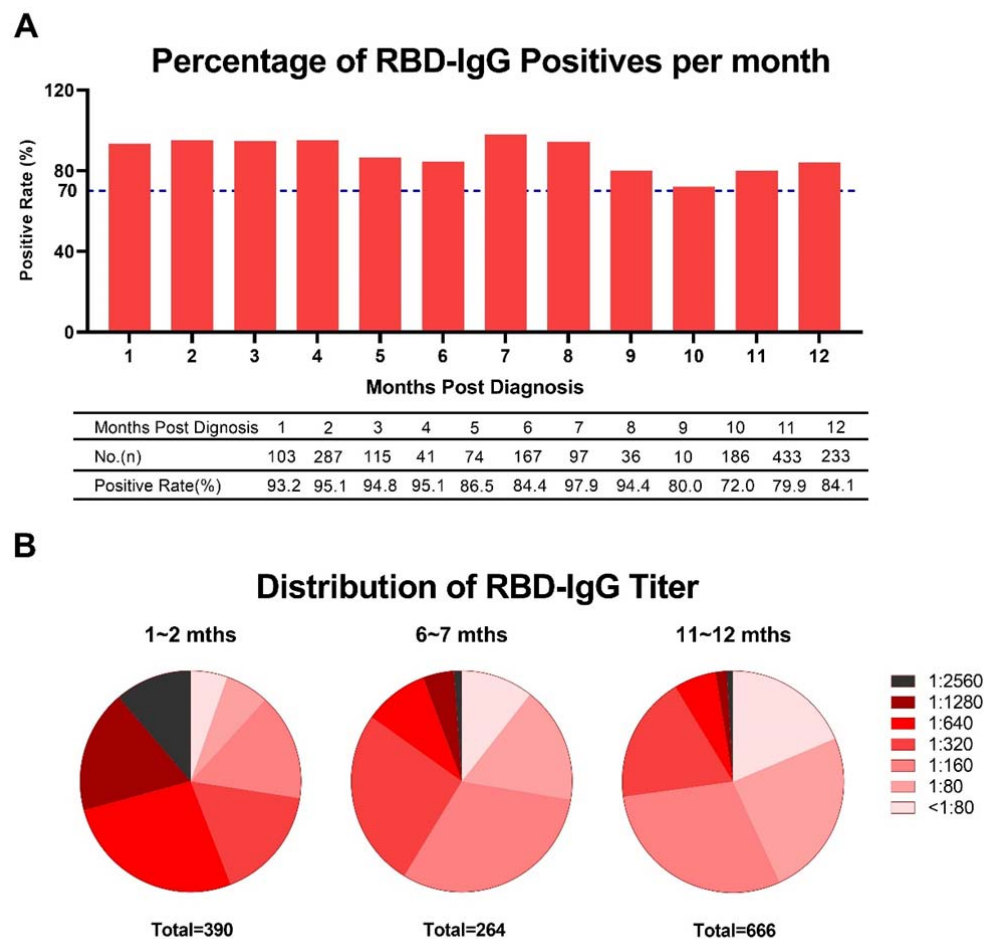

**Fig. 1 RBD-IgG titers against SARS-CoV-2 over times. (A)** Percentage changes of positive RBD-IgG. **(B)** Changes of RBD-IgG titers distribution. Titers less than 80 were considered as negative.

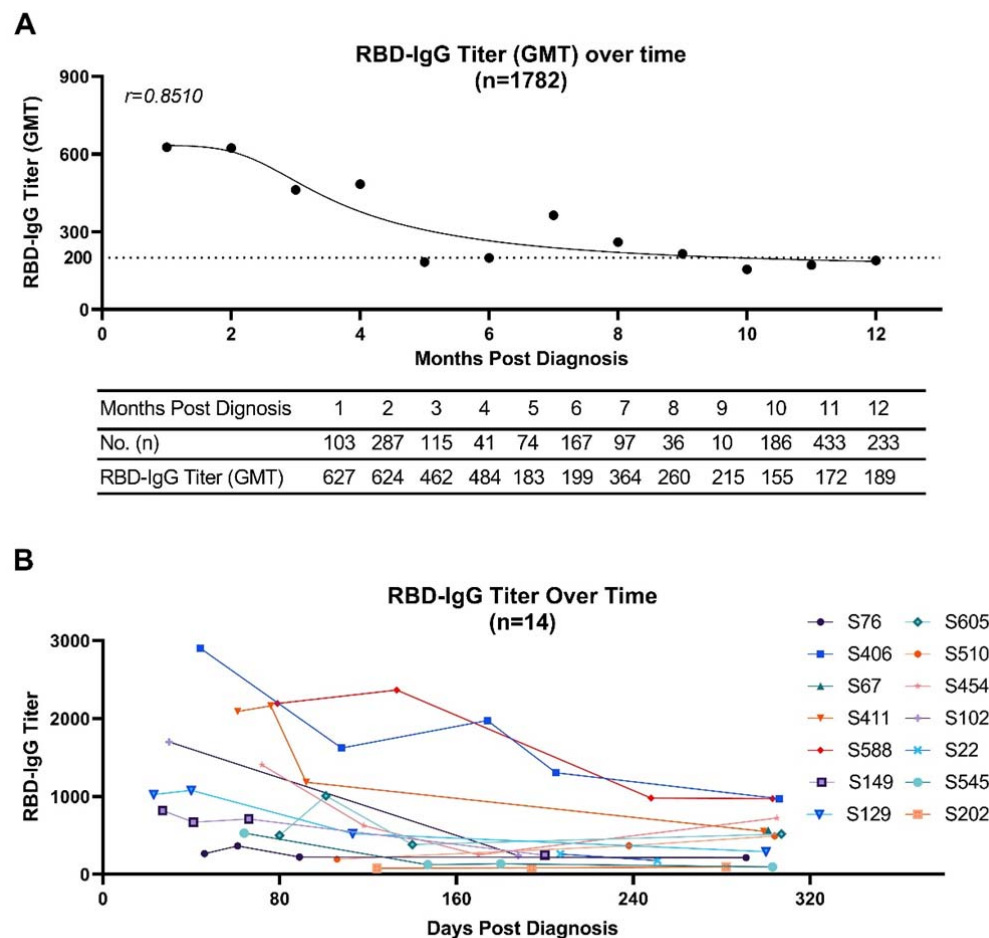

**Fig. 2 Kinetics of SARS-CoV-2 RBD-IgG responses.** (A) RBD-IgG kinetics curve of 1,782 plasma samples within 12 months. Monthly titer represents the GMT titer of all plasma samples collected in each individual month. (B) The RBD-IgG titers change in 14 COVID-19 convalescent plasma donors with continuous multiple pears.

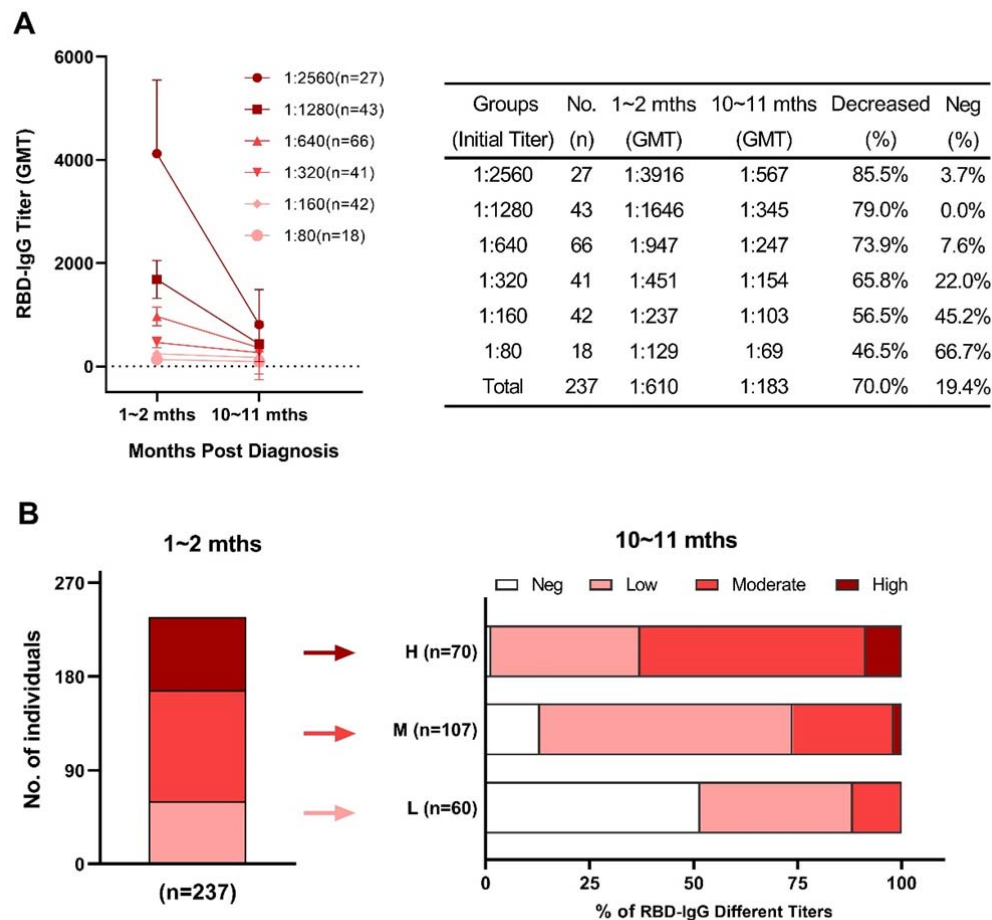

**Fig. 3 Stability of RBD-IgG titers over time.** (A) Changes of different RBD-IgG titers over time. A total of 237 COVID-19 convalescent plasma donors with different titer levels of RBD-IgG at the early stage who had donated plasma again at the 10th and 11th months, stratified with titers at the early stage following diagnosis, and the decline in titers and the proportion of plasma donors turning into negative were calculated. (B) Change of RBD-IgG titers in plasma donors with low, moderate, or high titers after a long period of time.

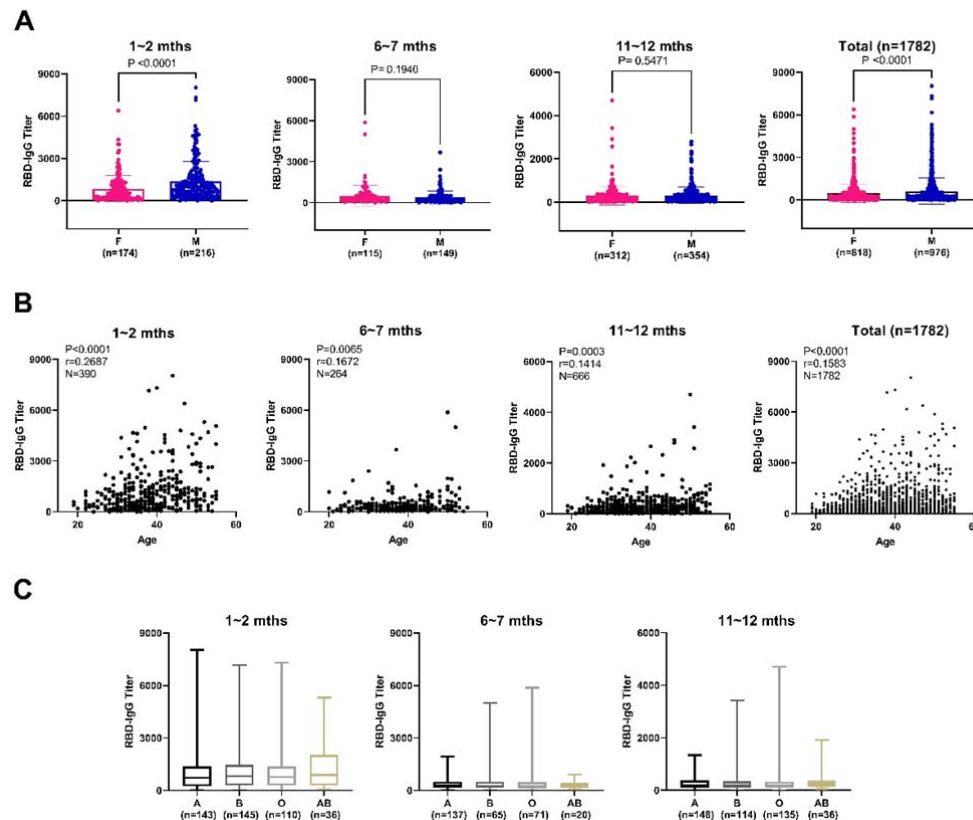

**Fig. 4 Influences of gender (A), age (B), and blood types (C) on RBD-IgG**

**response in COVID-19 plasma donors at different stages following diagnosis.**

Age has a positive correlation with the RBD-IgG titer, while insignificant difference

was found between blood types of the plasma donors and the RBD-IgG titers.

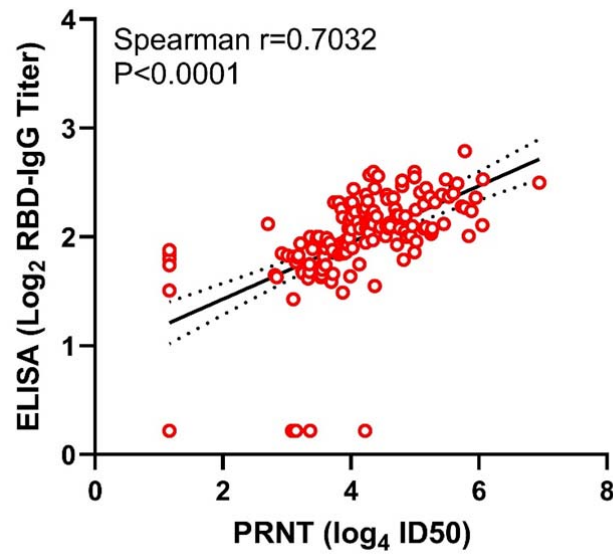

458

459 **Fig. 5 Neutralizing activity of plasma samples positively correlated with**

460 **RBD-IgG titers.** Neutralizing antibody titers were transformed by Log<sub>4</sub> and RBD-IgG

461 titers were transformed by Log<sub>2</sub>. The association between neutralizing antibody titers

462 and RBD-IgG titers was assessed by linear regression analysis and Spearman's

463 correlation.

464

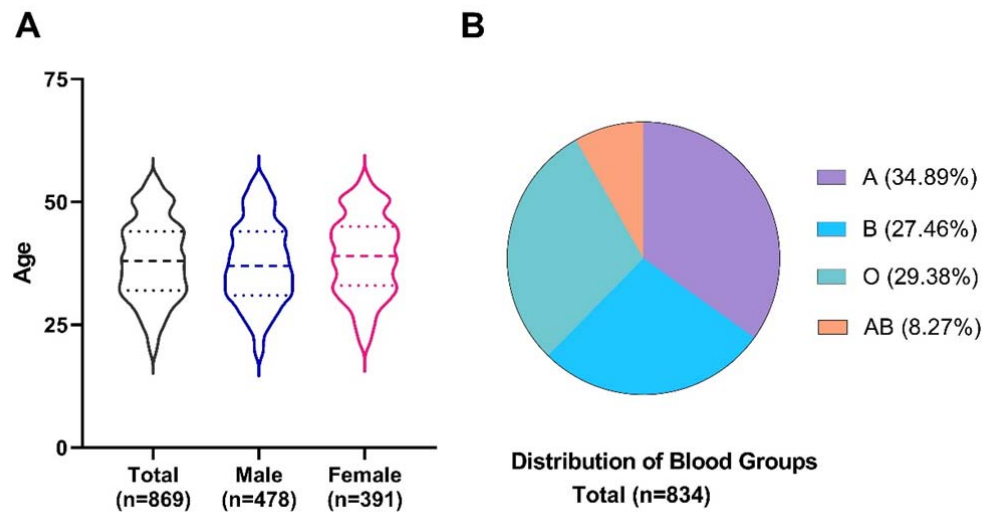

465

466 **Fig. 6 Distribution of age, gender (A), and blood types (B) in COVID-19**

467 **convalescent plasma donors recruited in this study.**

**A**

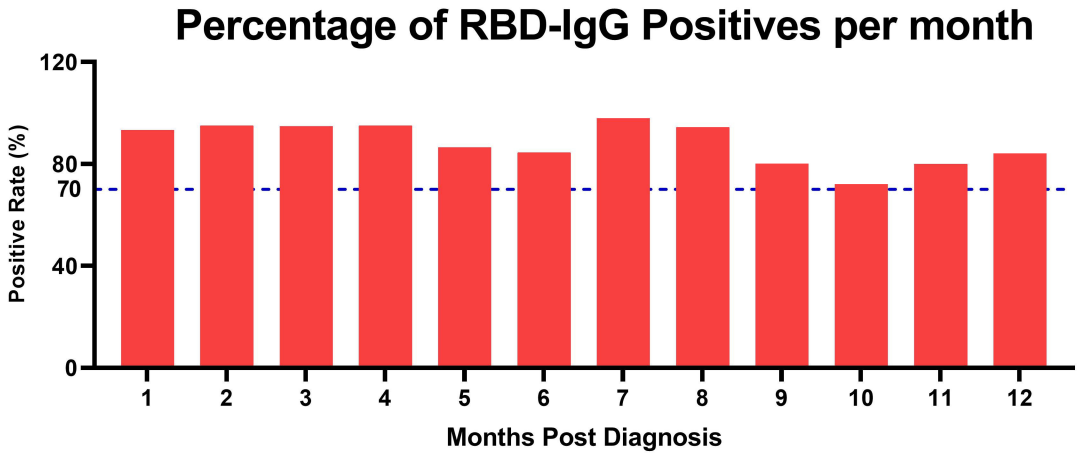

**B**

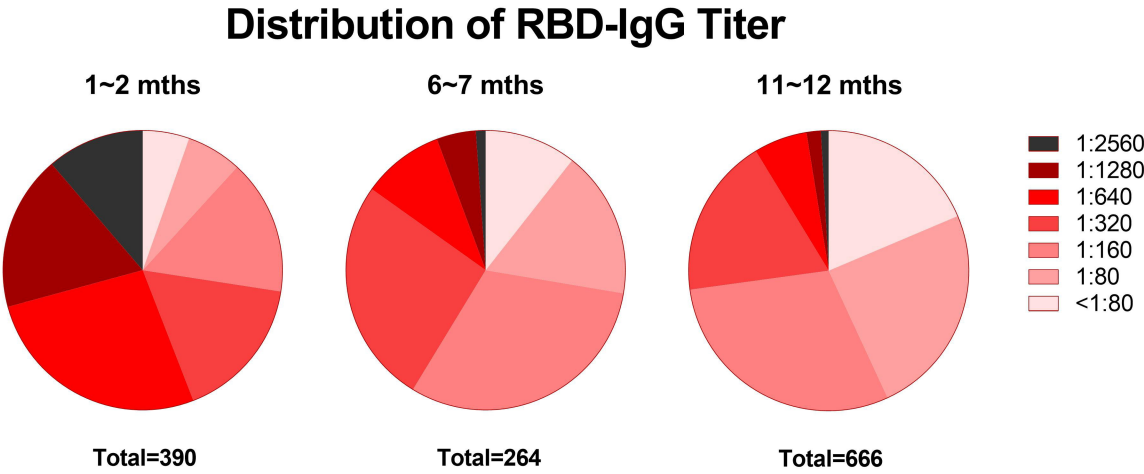

**A**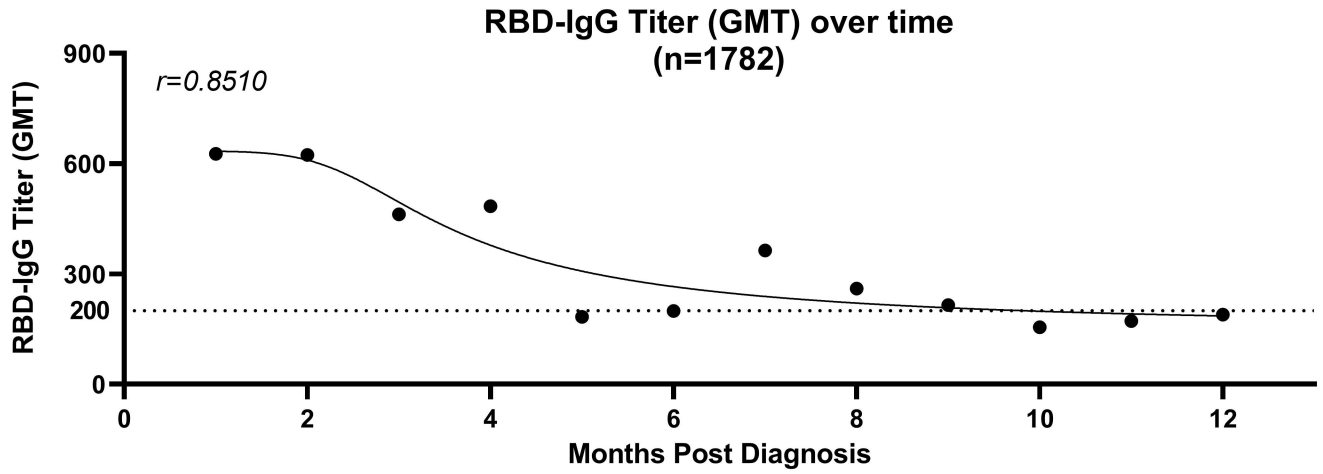

| Months Post Diagnosis | 1   | 2   | 3   | 4   | 5   | 6   | 7   | 8   | 9   | 10  | 11  | 12  |
|-----------------------|-----|-----|-----|-----|-----|-----|-----|-----|-----|-----|-----|-----|
| No. (n)               | 103 | 287 | 115 | 41  | 74  | 167 | 97  | 36  | 10  | 186 | 433 | 233 |
| RBD-IgG Titer (GMT)   | 627 | 624 | 462 | 484 | 183 | 199 | 364 | 260 | 215 | 155 | 172 | 189 |

**B**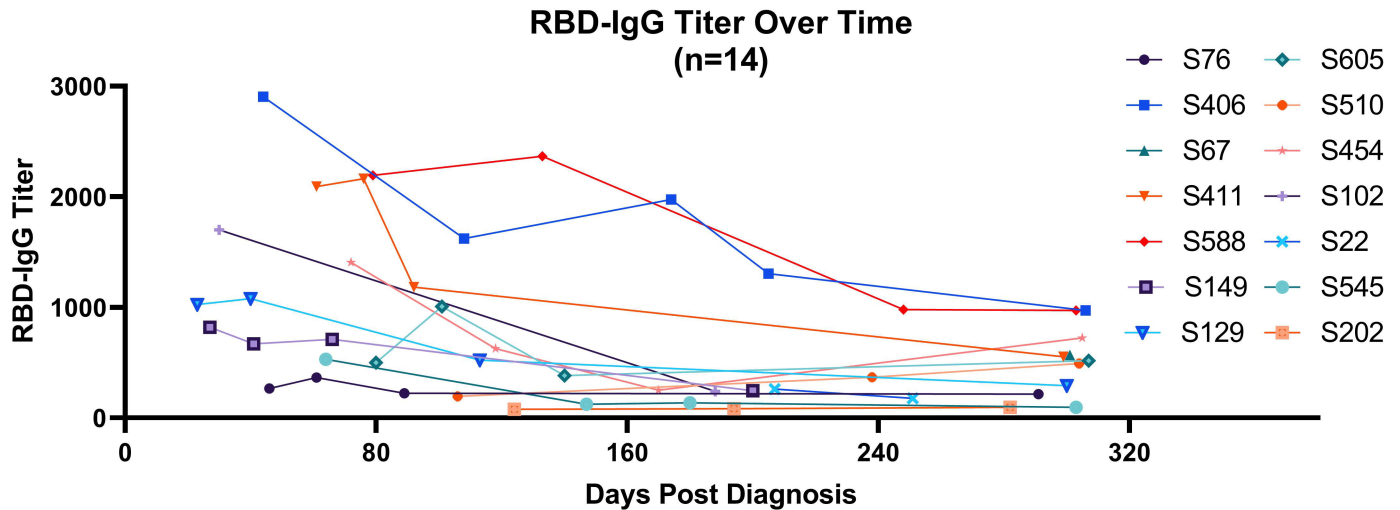



**A**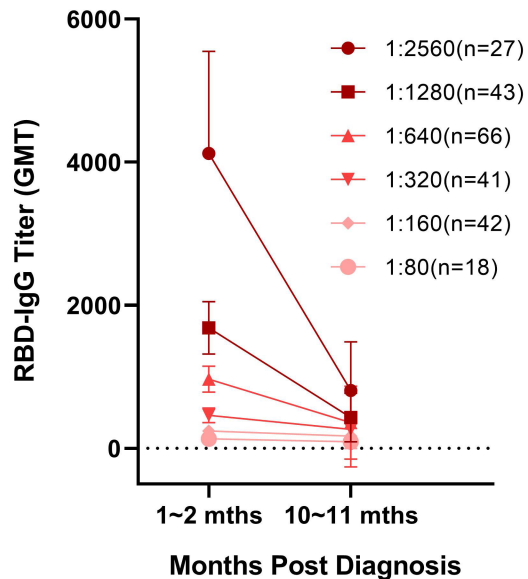

| Groups<br>(Initial Titer) | No.<br>(n) | 1~2 mths<br>(GMT) | 10~11 mths<br>(GMT) | Decreased<br>(%) | Neg<br>(%) |
|---------------------------|------------|-------------------|---------------------|------------------|------------|
| 1:2560                    | 27         | 1:3916            | 1:567               | 85.5%            | 3.7%       |
| 1:1280                    | 43         | 1:1646            | 1:345               | 79.0%            | 0.0%       |
| 1:640                     | 66         | 1:947             | 1:247               | 73.9%            | 7.6%       |
| 1:320                     | 41         | 1:451             | 1:154               | 65.8%            | 22.0%      |
| 1:160                     | 42         | 1:237             | 1:103               | 56.5%            | 45.2%      |
| 1:80                      | 18         | 1:129             | 1:69                | 46.5%            | 66.7%      |
| Total                     | 237        | 1:610             | 1:183               | 70.0%            | 19.4%      |

**B**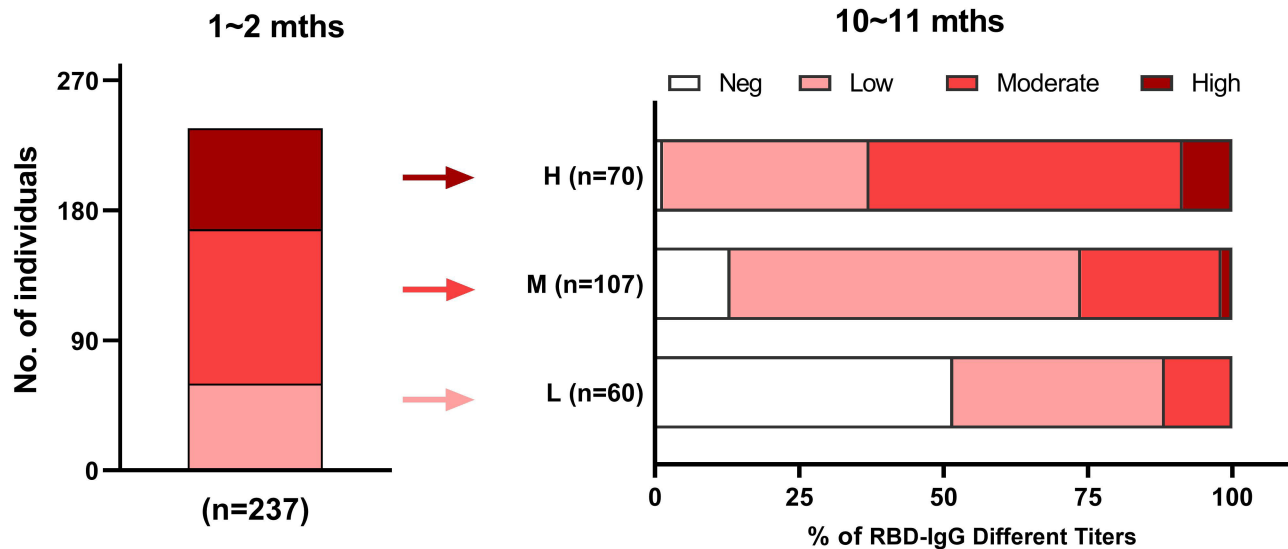

**A**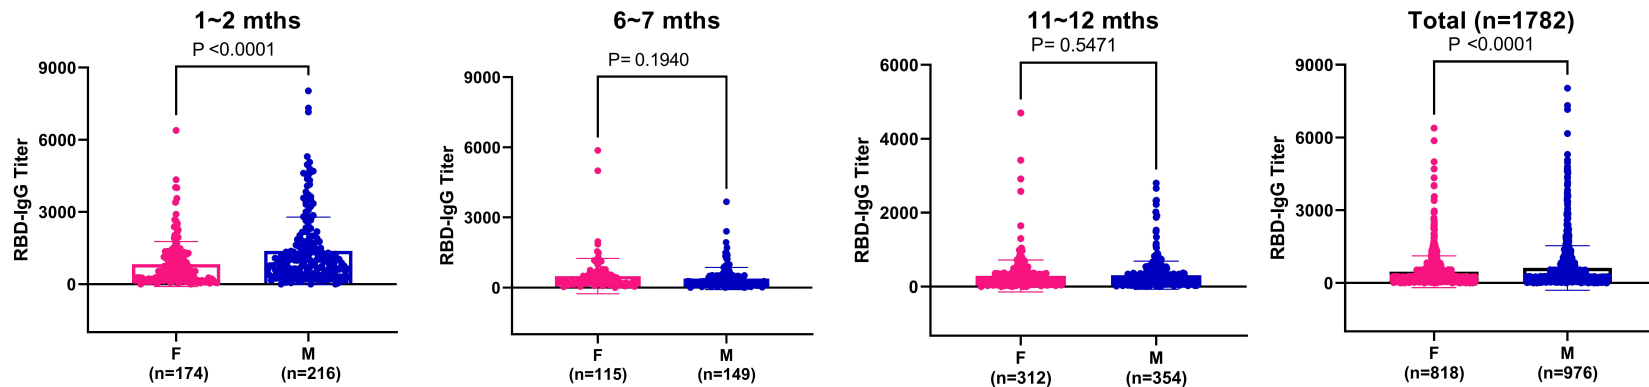**B**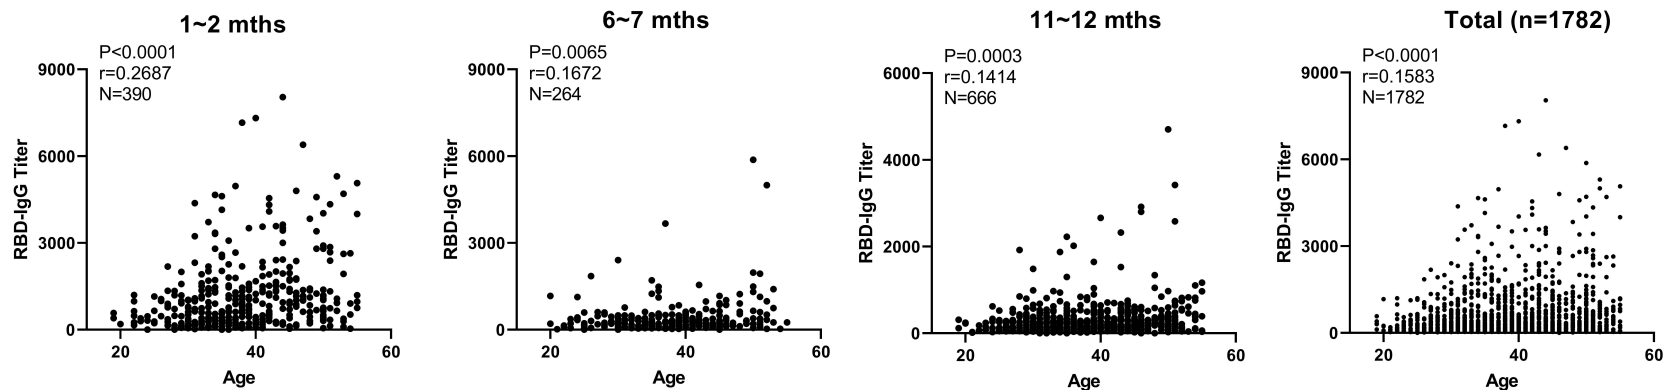**C**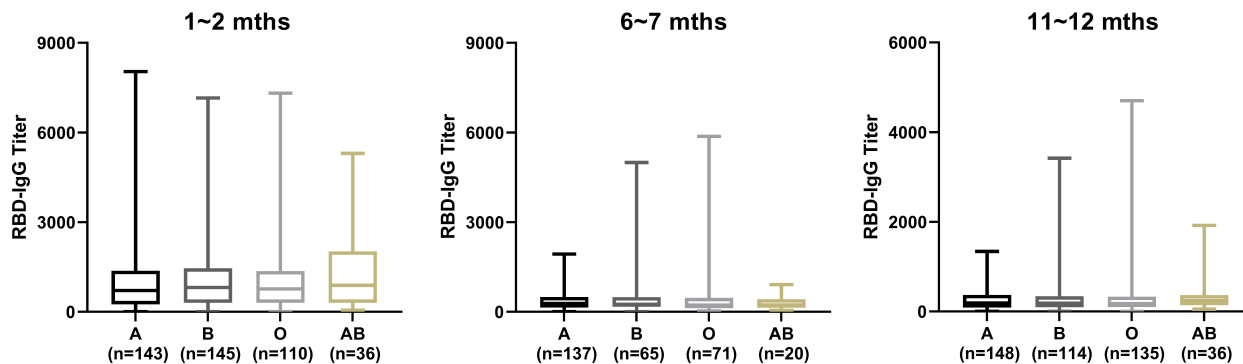

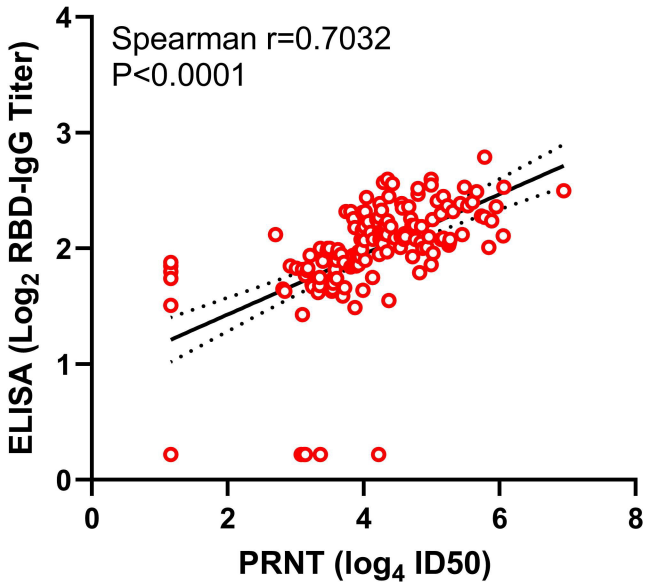

**A**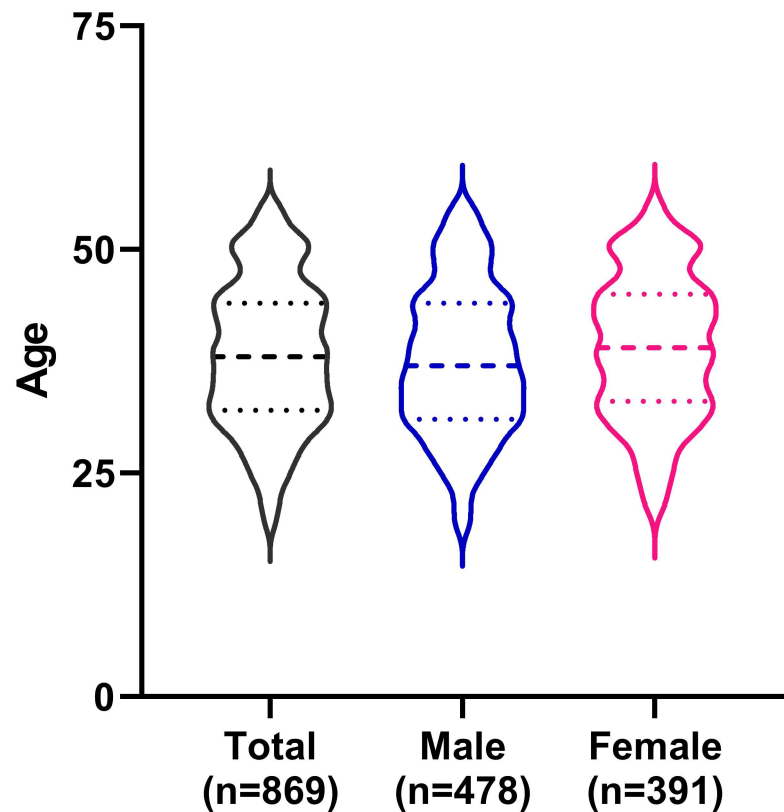**B**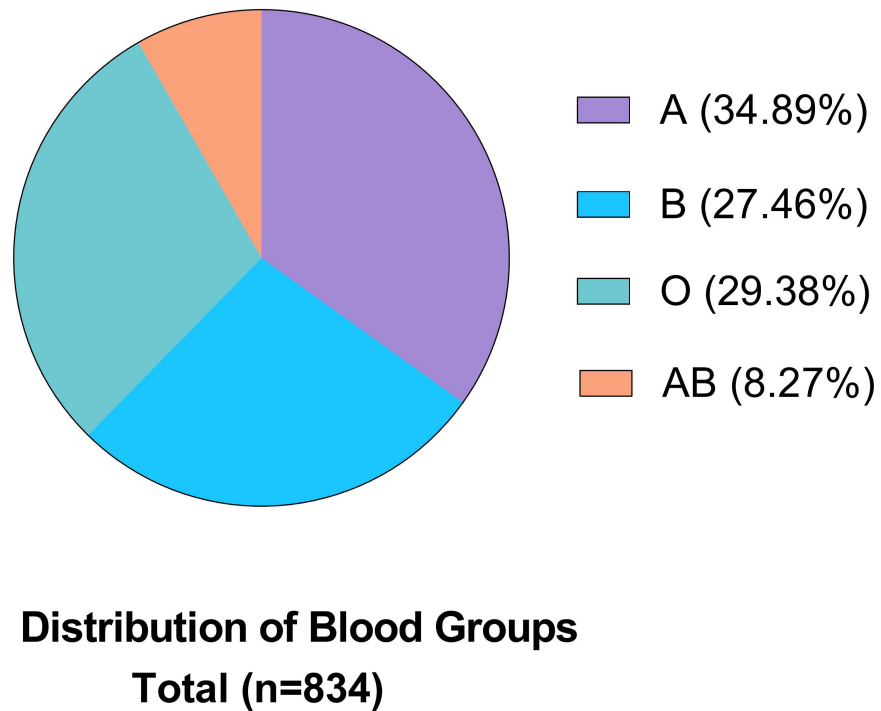

Source: https://www.biorxiv.org/content/10.1101/2021.04.05.437224v1.full.pdf
