# Supplementary material for: Twelve-month specific IgG response to SARS-CoV-2 receptor-binding domain among COVID-19 convalescent plasma donors in Wuhan
Source: bioRxiv or medRxiv preprint supplement (doi:10.1101/2021.04.05.437224), 2021-06-03
Supplement: Supplementary file [file media-1.pdf]

## Supplemental Tables

**Supplemental Table 1 Percentage changes of RBD-IgG titers distribution of COVID-19 convalescent plasma donors at early, middle, and late stages following diagnosis.**

|        | %          |            |              |
|--------|------------|------------|--------------|
|        | 1-2 months | 6-7 months | 11-12 months |
| 1:2560 | 11.3       | 1.1        | 0.9          |
| 1:1280 | 17.9       | 4.5        | 1.7          |
| 1:640  | 26.7       | 9.5        | 6.2          |
| 1:320  | 16.7       | 26.1       | 18.5         |
| 1:160  | 15.6       | 31.1       | 29.7         |
| 1:80   | 6.4        | 17.0       | 24.5         |
| <1:80  | 5.4        | 10.6       | 18.6         |

**Supplemental Table 2 Percentage changes of RBD-IgG titers in plasma donors with low, moderate, or high titers after a long period of time.**

|         |                  | % at 10-11 months |          |       |          |
|---------|------------------|-------------------|----------|-------|----------|
|         |                  | High              | Moderate | Low   | Negative |
| Initial | High (n=70)      | 8.57              | 54.29    | 35.71 | 1.43     |
|         | Moderate (n=107) | 1.87              | 24.30    | 60.75 | 13.08    |
|         | Low (n=60)       | 0.00              | 11.67    | 36.67 | 51.67    |
