# Supplementary material for: Twelve-month specific IgG response to SARS-CoV-2 receptor-binding domain among COVID-19 convalescent plasma donors in Wuhan
Source: bioRxiv or medRxiv preprint supplement (doi:10.1101/2021.04.05.437224), 2021-06-03
Supplement: Supplementary file [file media-1.pdf]

# Supplementary Materials for

## Twelve-month specific IgG response to SARS-CoV-2 receptor-binding domain among COVID-19 convalescent plasma donors in Wuhan

Cesheng Li<sup>1,\*</sup>, Ding Yu<sup>2,3,\*</sup>, Xiao Wu<sup>1</sup>, Hong Liang<sup>2,3</sup>, Zhijun Zhou<sup>1</sup>, Yong Xie<sup>1,3</sup>, Taojing Li<sup>3</sup>, Junzheng Wu<sup>2</sup>, Fengping Lu<sup>1</sup>, Lu Feng<sup>1</sup>, Min Mao<sup>1</sup>, Lianzhen Lin<sup>1</sup>, Huanhuan Guo<sup>1</sup>, Shenglan Yue<sup>1</sup>, Feifei Wang<sup>1</sup>, Yan Peng<sup>1</sup>, Yong Hu<sup>1</sup>, Zejun Wang<sup>4</sup>, Jianhong Yu<sup>1</sup>, Yong Zhang<sup>3</sup>, Jia Lu<sup>4</sup>, Haoran Ning<sup>1</sup>, Huichuan Yang<sup>4</sup>, Daoxing Fu<sup>3</sup>, Yanlin He<sup>1,3</sup>, Dongbo Zhou<sup>3,4</sup>, Tao Du<sup>3</sup>, Kai Duan<sup>4</sup>, Demei Dong<sup>3</sup>, Kun Deng<sup>1</sup>, Xia Zou<sup>1</sup>, Ya Zhang<sup>1</sup>, Rong Zhou<sup>3</sup>, Yang Gao<sup>3</sup>, Xinxin Zhang<sup>6,#</sup> & Xiaoming Yang<sup>4,#</sup>

<sup>1</sup>Sinopharm Wuhan Plasma-derived Biotherapies Co., Ltd, 430207 Wuhan, China.

<sup>2</sup>Chengdu Rongsheng Pharmaceuticals Co., Ltd, 610041 Chengdu, China.

<sup>3</sup>Beijing Tiantan Biological Products Co., Ltd, 100024 Beijing, China.

<sup>4</sup>China National Biotec Group Company Limited, 100029 Beijing, China.

<sup>5</sup>Wuhan Institute of Biological Products Co. Ltd., 430207 Wuhan, China.

<sup>6</sup>Research Laboratory of Clinical Virology, Ruijin Hospital and Ruijin Hospital North, National Research Center for Translational Medicine, Shanghai Jiao Tong University of Medicine, 200025 Shanghai, China.

**\*Equal contributing authors**

**#Jointly supervising authors**

**Supplemental Table 1 Percentage changes of RBD-IgG titers distribution of COVID-19 convalescent plasma donors at early, middle, and late stages following diagnosis.**

|        | Percentage (%) |            |              |
|--------|----------------|------------|--------------|
|        | 1-2 months     | 6-7 months | 11-12 months |
| 1:2560 | 11.28          | 1.14       | 0.90         |
| 1:1280 | 17.95          | 4.55       | 1.65         |
| 1:640  | 26.67          | 9.47       | 6.16         |
| 1:320  | 16.67          | 26.14      | 18.47        |
| 1:160  | 15.64          | 31.06      | 29.73        |
| 1:80   | 6.41           | 17.05      | 24.32        |
| <1:80  | 5.38           | 10.61      | 18.77        |

**Supplemental Table 2 Percentage changes of RBD-IgG titers in plasma donors with low, moderate, or high titers after a long period of time.** Negative, titers less than 1:80. High (high titers), titers of 1:1280 and  $\geq$  1:2560. Moderate (moderate titers), titers of 1:320-1:640. Low (low titers), titers of 1:80-1:160.

|         |                  | <b>% at 10-11 months</b> |                 |            |                 |
|---------|------------------|--------------------------|-----------------|------------|-----------------|
|         |                  | <b>High</b>              | <b>Moderate</b> | <b>Low</b> | <b>Negative</b> |
| Initial | High (n=70)      | 8.57                     | 54.29           | 35.71      | 1.43            |
|         | Moderate (n=107) | 1.87                     | 24.30           | 60.75      | 13.08           |
|         | Low (n=60)       | 0.00                     | 11.67           | 36.67      | 51.67           |
